# Supplementary material for: Fracture-induced softening for large-scale ice dynamics
Source: Copernicus journal article supplement (doi:10.5194/tc-8-587-2014), 2014-04-08
Supplement: Supplementary file 1 [file tc-8-587-2014-supplement.zip]

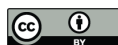

## Supplement

T. Albrecht<sup>1,2</sup> and A. Levermann<sup>1,2</sup>

<sup>1</sup>Earth System Analysis, Potsdam Institute for Climate Impact Research, Potsdam, Germany

<sup>2</sup>Institute of Physics and Astronomy, University of Potsdam, Potsdam, Germany

Correspondence to: T. Albrecht (torsten.albrecht@pik-potsdam.de)

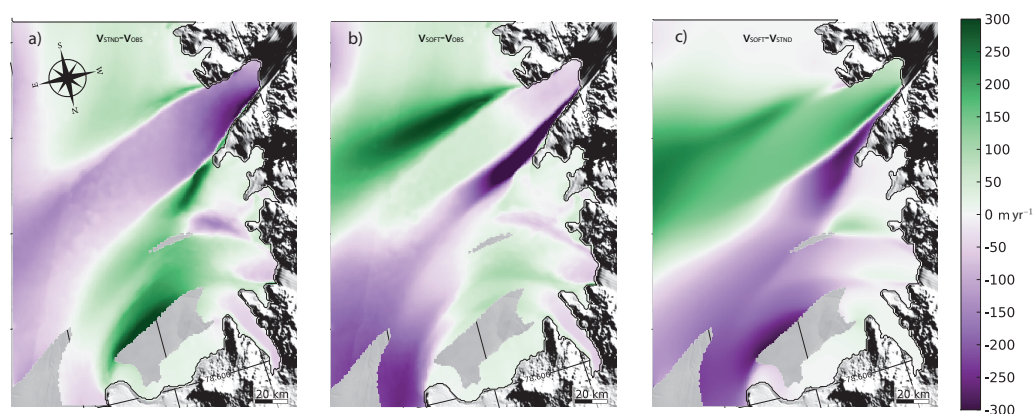

**Fig. S1.** Byrd Inlet ice speed anomalies (a) standard model minus observations, (b) fracture-softened model minus observations and (c) fracture-softened model minus standard model.

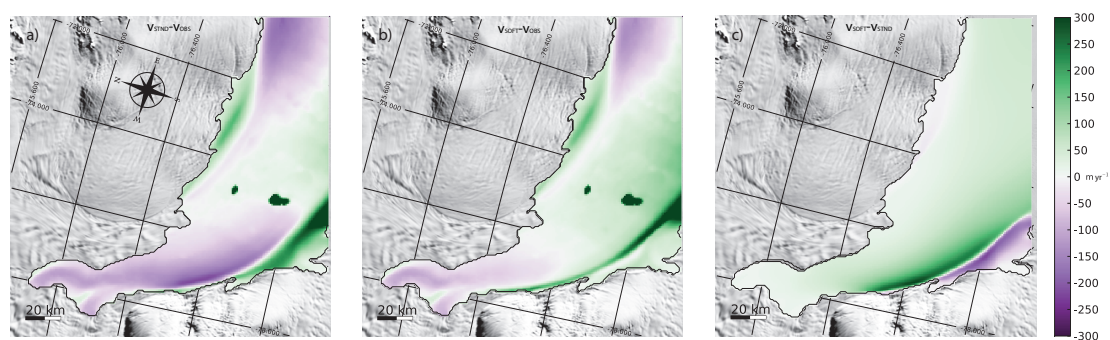

**Fig. S2.** Evans Inlet ice speed anomalies (a) standard model minus observations, (b) fracture-softened model minus observations and (c) fracture-softened model minus standard model.

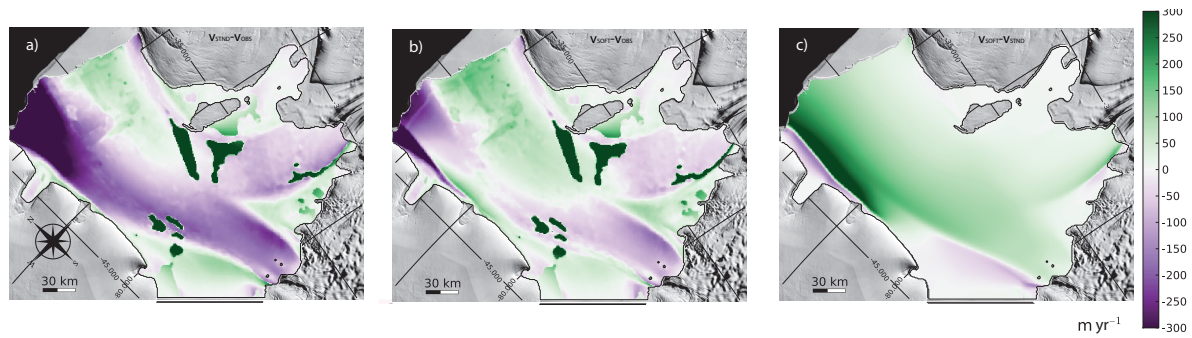

**Fig. S3.** Filchner Ice Shelf ice speed anomalies (a) standard model minus observations, (b) fracture-softened model minus observations and (c) fracture-softened model minus standard model.

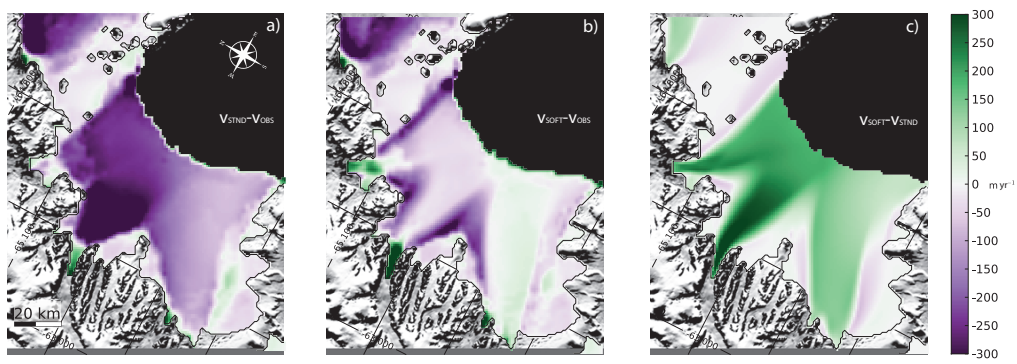

**Fig. S4.** Larsen B ice speed anomalies (a) standard model minus observations, (b) fracture-softened model minus observations and (c) fracture-softened model minus standard model.
